# Supplementary material
Source: PubMed Central journal article supplement (PMC4015078)
Supplement: Supp_Fig1.pdf [file Supp_Fig1.pdf]

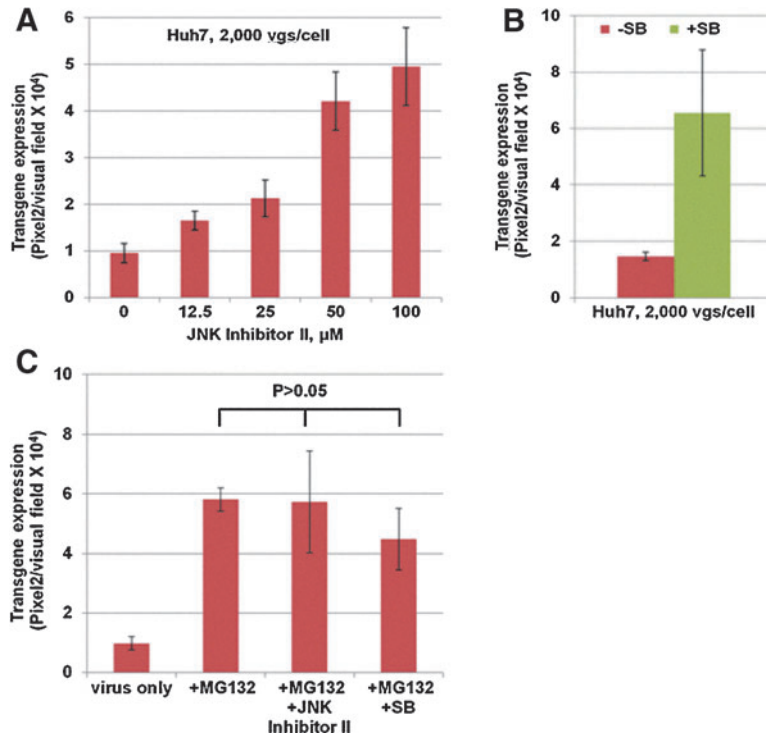

**SUPPLEMENTARY FIG. S1.** Effect of serine/threonine kinase inhibitors on scAAV3 vector-mediated EGFP expression in Huh7 cells. Cells were transduced with scAAV3 vectors in the presence of increasing amounts of JNK inhibitor II (**A**), 12.5  $\mu\text{M}$  p38 MAPK inhibitor (SB) (**B**), and 5  $\mu\text{M}$  MG132 alone, or with 50  $\mu\text{M}$  JNK Inhibitor II or 12.5  $\mu\text{M}$  p38 MAPK inhibitor (**C**). Transgene expression was determined by fluorescence microscopy 72 hr post-transduction and assessed as total area of green fluorescence (pixel<sup>2</sup>) per visual field (mean  $\pm$  SD).
