# Supplementary material
Source: PubMed Central journal article supplement (PMC4015078)
Supplement: Supp_Fig2.pdf [file Supp_Fig2.pdf]

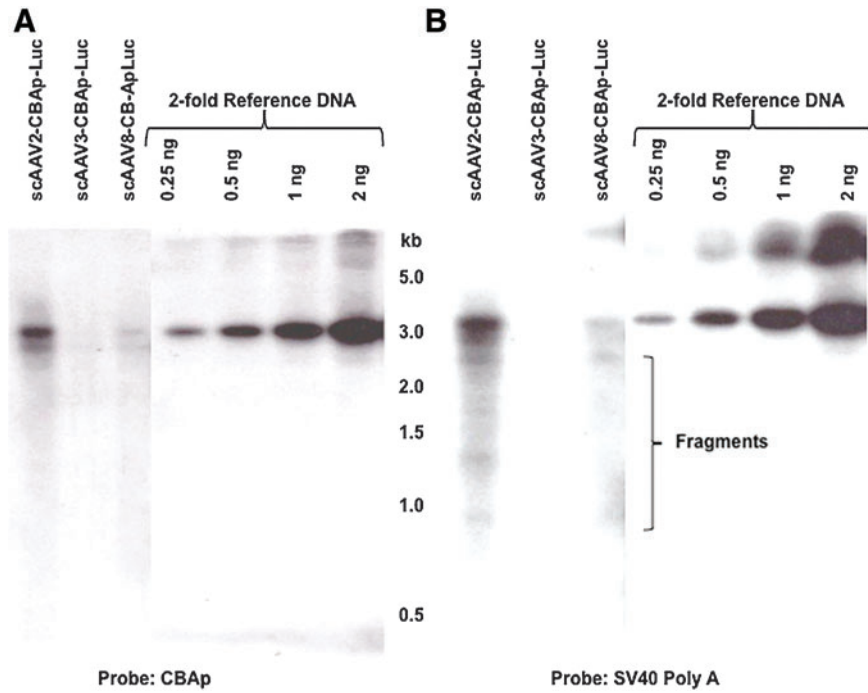

**SUPPLEMENTARY FIG. S2.** Characterization of scAAV2-, scAAV3-, and scAAV8-CBAP-Luc vector genomes by Southern blot assays. A representative native agarose gel electrophoresis and Southern blot examination of the isolated viral genomes from scAAV2, scAAV3, and scAAV8 serotype vectors. The membranes were analyzed using  $^{32}\text{P}$ -labeled DNA probes specific to (A) CBAP or (B) SV40 Poly (A) sequences. Results in each panel are representative of two independent experiments.
