# Supplementary material
Source: PubMed Central journal article supplement (PMC4015078)
Supplement: Supp_Table1.pdf [file Supp_Table1.pdf]

SUPPLEMENTARY TABLE S1. NUCLEOTIDE SEQUENCES OF PRIMERS USED FOR SITE-DIRECTED MUTAGENESIS OF SURFACE-EXPOSED SERINE RESIDUES ON AAV3 CAPSID

| <i>Mutants</i> | <i>Primer sequences (5'–3')<sup>a</sup></i>                         |
|----------------|---------------------------------------------------------------------|
| S459V          | GAACAACCTCTGGAACAACCAACCAAG <b><u>GT</u></b> ACGGCTGCTTTTTAGCCAGGCT |
| S663V          | GGCAAATCCTCCGACGACTTTC <b><u>GT</u></b> CCCGGCCAAGTTTGCTTCATT       |

<sup>a</sup>The codon triplets of VP3 are shown in bold; underlining denotes the mutations from serine to valine residues.
