# Supplementary material
Source: PubMed Central journal article supplement (PMC4015078)
Supplement: Supp_Table2.pdf [file Supp_Table2.pdf]

SUPPLEMENTARY TABLE S2. LENGTHS AND %GC CONTENT  
OF VARIOUS DNA PROBES USED

| <i>Probe</i>             | <i>Length (bp)</i> | <i>Fragments</i>    | <i>%GC content</i> |
|--------------------------|--------------------|---------------------|--------------------|
| CBAp                     | 584                | <i>Acc65I-SacII</i> | 59                 |
| EGFP                     | 744                | <i>AgeI-HindIII</i> | 62                 |
| SV40 Poly (A)            | 218                | <i>AccI-BbsI</i>    | 55                 |
| Full-length              | 1994               | <i>XmaI</i>         | 59                 |
| HS2- $\beta$ p           | 275                | <i>XhoI-HindIII</i> | 41                 |
| $\beta$ -globin Poly (A) | 260                | <i>PstI</i>         | 45                 |
